# Supplementary material for: TRF2-mediated ORC recruitment underlies telomere stability upon DNA replication stress
Source: PubMed Central journal article supplement — Nucleic Acids Res. 2021 Nov 11;49(21):12234–51. doi: 10.1093/nar/gkab1004 (PMC8643664; doi:10.1093/nar/gkab1004), 2021-11-11
Supplement: gkab1004_supplemental_file.pdf [file gkab1004_supplemental_file.pdf]

## **SUPPLEMENTARY DATA**

### **TRF2-mediated ORC recruitment underlies telomere stability upon DNA replication stress**

Mitsunori Higa, Yukihiro Matsuda, Jumpei Fujii, Nozomi Sugimoto, Kazumasa Yoshida, and Masatoshi Fujita

#### **Supplementary Figure Legends**

##### **Supplementary Figure S1. Representative images of TRF2 (45-244)-LacI and ORC1 at *lacO* arrays in U2OS 2-6-3 cells.**

U2OS 2–6-3 cells were transfected with HA-LacI or TRF2 (45-244) mutant-LacI expression vectors for 24 h and then double-immunostained with anti-LacI (red) and anti-ORC1 (green) antibodies, followed by DAPI staining. Representative images of two independent experiments are shown. White arrows indicate colocalization of ORC1 with the foci of LacI proteins. The colocalization frequencies are shown in Figure 1B. Scale bar, 10  $\mu$ m.

##### **Supplementary Figure S2. Source data and supplemental analysis of ChIP experiments.**

(A) % of input values used for the calculation in Figure 3E are shown.

(B) The relative specific ChIP values (mean values; Fig. 3E) normalized to the TRF2/CBB values (mean values; Fig. 3D) are shown.

##### **Supplementary Figure S3. The ratio of telomere-free micronuclei/nucleus in the HeLa clones.**

In the experiments shown in Figure 4D, the number of telomere-free micronuclei were also counted. The means  $\pm$  SDs are shown (n = 3). n.s., not significant (two-tailed Student's t-test).

**Supplementary Figure S4. Co-localization frequencies of wild-type and L229A ORC1 with TRF2 $\Delta$ Myb-LacI.**

After co-transfection with the indicated ORC1 and LacI expression vectors, U2OS 2-6-3 cells were subjected to co-immunostaining with anti-LacI and anti-FLAG antibodies. Co-localization frequency was examined. The values represent the score from two independent experiments. <sup>a</sup> Total number of LacI foci. <sup>b</sup> Number of LacI foci co-localizing with FLAG foci. <sup>c</sup> Co-localization frequency of FLAG foci with LacI foci. <sup>d</sup> Results of the  $\chi^2$  test in comparison with HA-LacI. \*\*\*, P < 0.001.

TRF2 $\Delta$ Myb, consisting of the amino acids 1-445 but lacking the Myb domain, has been reported to recruit ORC1 to the *lacO* array when fused to LacI (Higa et al. 2017 BBA Mol Cell Res 1864: 191-201). The data presented show that the co-localization frequency of ORC1 (L229A)-3 $\times$ FLAG with TRF2 $\Delta$ Myb-LacI was ~48%, which was comparable to that of wild-type ORC1-3 $\times$ FLAG (~45%).

**Supplementary Figure S5. Overexpression of FLAG-ORC1 (244-511) fragment reduces ORC1-3 $\times$ FLAG co-immunoprecipitation with HA-TRF2.**

The signal intensities of the bands shown in Figure 6A were quantitated and relative ORC1-3 $\times$ FLAG co-immunoprecipitation values were calculated by normalizing the signals of co-precipitated ORC1-3 $\times$ FLAG to those of the precipitated TRF2-LacI. The mean and the individual data from two independent experiments are shown with the value with the empty vector set as 1.

**Supplementary Figure S6. Overexpression of FLAG-ORC1 (244-511) fragment does not affect co-immunoprecipitation of RAP1 and SLX4 with HA-TRF2.**

(A) At 42 h post-transfection with the indicated vectors, HCT116 cells were harvested and immunoprecipitated with an anti-RAP1 antibody or normal rabbit IgG (Control IP). IPs and 3% of input were analyzed by immunoblotting with the indicated antibodies. The representative data of two independent experiments were shown.

(B) At 42 h post-transfection with the indicated vectors, HEK293T cells were harvested and

immunoprecipitated with an anti-HA antibody or normal rat IgG (Control IP). IPs and 0.5% of input were analyzed by immunoblotting with the indicated antibodies. The representative data of two independent experiments were shown.

**Supplementary Figure S7. Re-replication induced by co-expression of Cdt1 + ORC1 is dependent on the ORC1 Walker B motif.**

HEK293T cells were co-transfected with a mixture of the expression vectors (T7-Cdt, ORC1 (WT)-3×FLAG, and ORC1 (D620A)-3×FLAG) or their empty vectors (-), as indicated for 48 h. *Top*, DNA content was analyzed by flow cytometry. The percentage of re-replicated cells was calculated as in Figure 6D. *Bottom*, whole-cell lysates were subjected to immunoblotting with the indicated antibodies. CBB staining serves as the loading control. The results of two independent experiments are shown. These data show that the disruption of ORC1 Walker B motif (D620A) abolishes re-replication induced by co-expression of Cdt1 + ORC1.

**Supplementary Figure S8. Overexpression of an HA-ORC1 (244-411) fragment does not affect HeLa cell proliferation.**

(A) HeLa cells stably expressing HA-ORC1 (244-411) fragment were established by retroviral infection. Expression of the introduced protein was analyzed by immunoblotting with anti-HA antibody. CBB serves as a loading control. (B) The cell growth was investigated for five days. The means  $\pm$  SDs are shown (n = 2). (C) The cell cycle was analyzed by flow cytometry. The means  $\pm$ SDs are shown (n = 2).

**Supplementary Figure S9. Source data of ChIP experiments.**

% of input values used for the calculation in Figure 7B are shown.

**Supplementary Figure S10. Schematics of ORC1 domain architecture showing the predicted intrinsically disordered region.**

(A-C) Intrinsically disordered region in ORC1 was predicted by (A) PrDOS (Ishida and

Kinoshita, 2007) or (B) IUPred2A (Mészáros *et al.*, 2018). Predicted disorder probability is plotted. Red horizontal line represents the disorder/order threshold (a cutoff value 0.5) and residues scored above the line are predicted to be disordered. (C) Schematics of the intrinsically disordered region in ORC1. Purple rectangles represent overlapping regions of disorder predicted by each server. (D) Schematics of the full-length human ORC and ORC1 (244-511) fragments used in this study. BAH, bromo adjacent homology domain; AAA+, ATPases associated with diverse cellular activities domain; WH, winged-helix domain.

#### References:

1. T. Ishida and K. Kinoshita (2007) PrDOS: Prediction of disordered protein regions from amino acid sequence. *Nucleic Acids Res.* 35: W460-W464.
2. B. Mészáros, G. Erdős, and Z. Dosztányi (2018) IUPred2A: Context-dependent prediction of protein disorder as a function of redox state and protein binding. *Nucleic Acids Res.* 46: W329–W337.

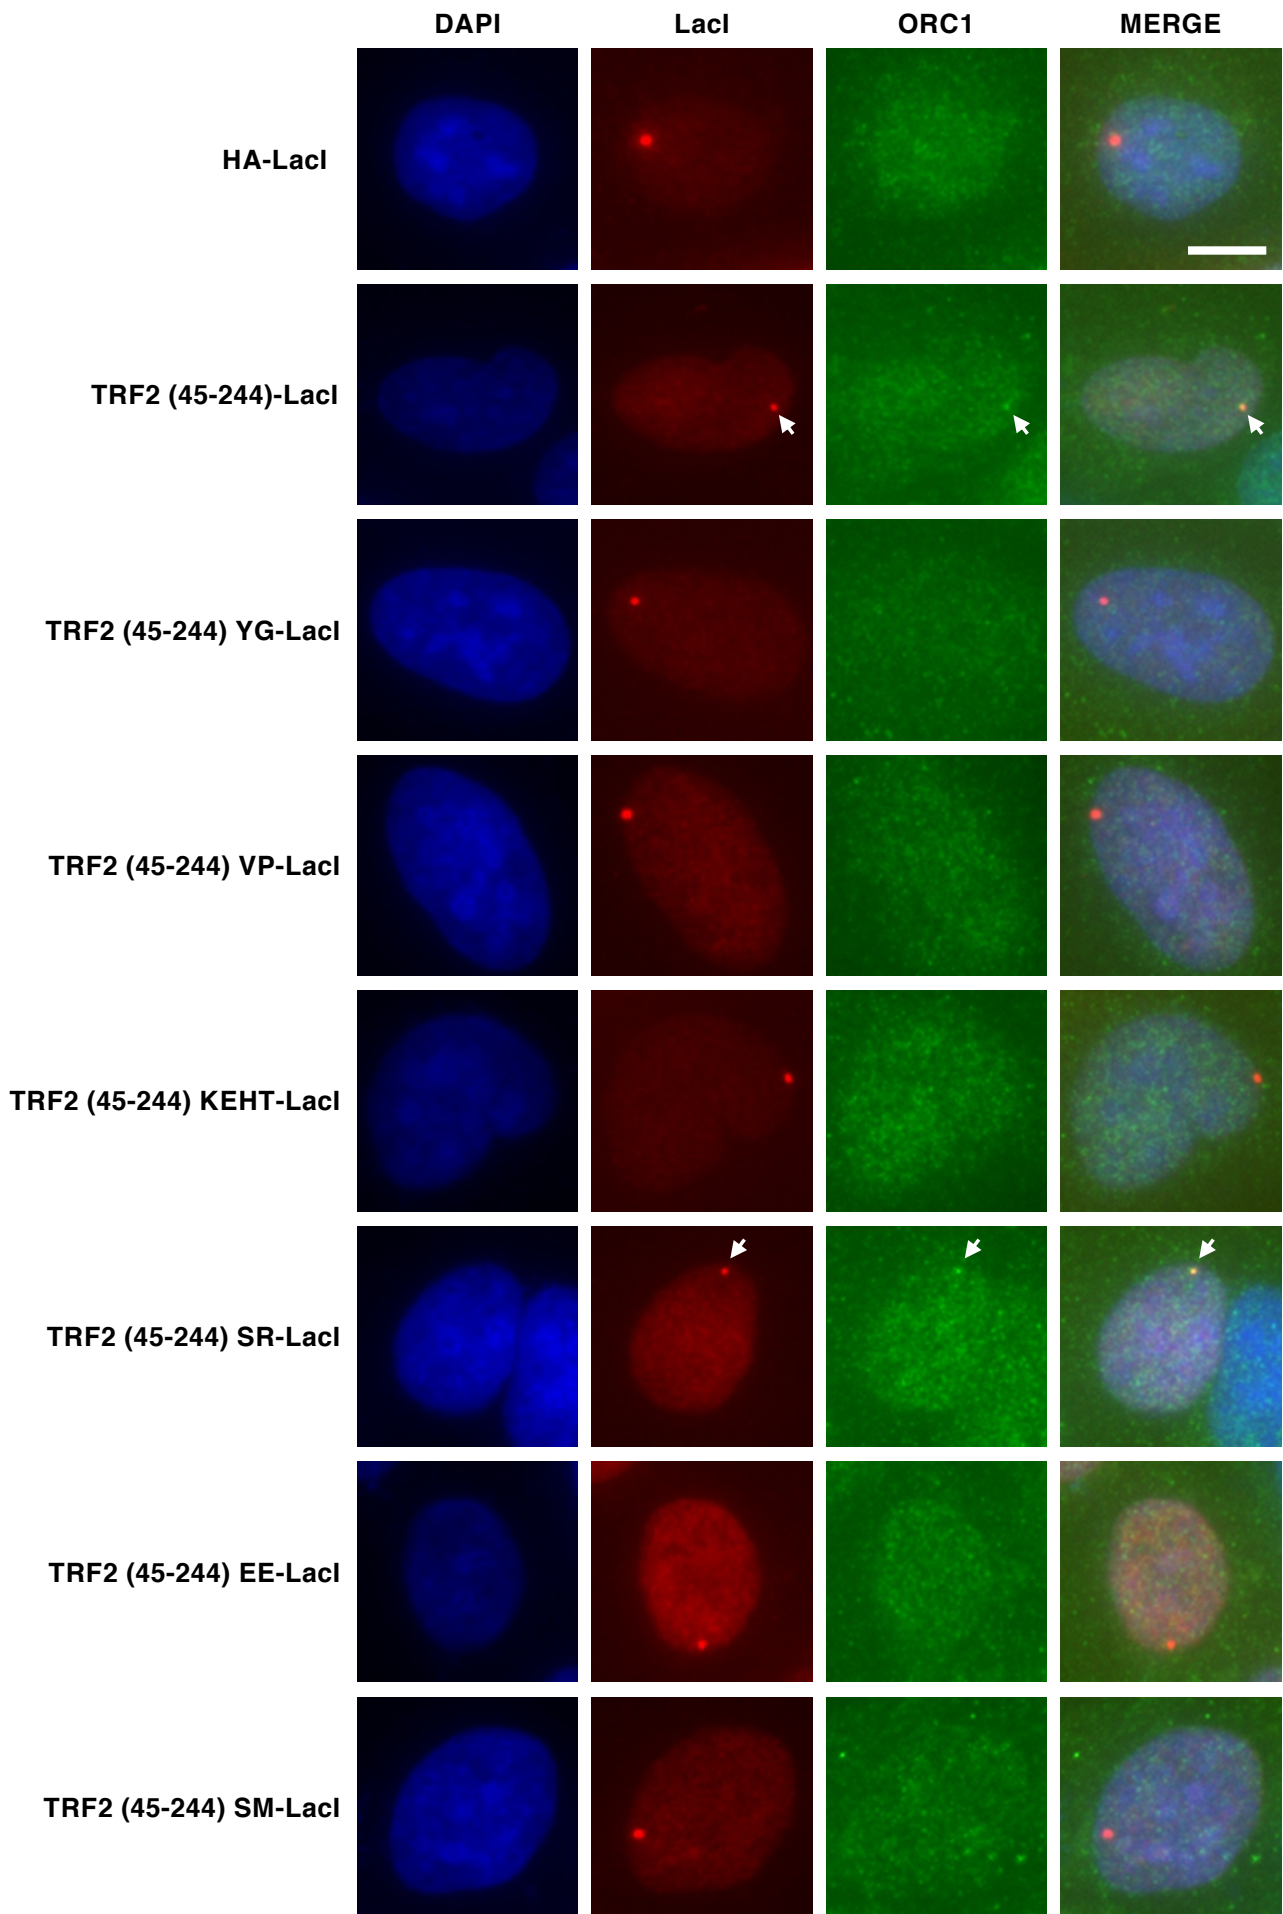

Supplementary Figure S1. Higa et al.

**A****ORC1-3xFLAG ChIP - qPCR**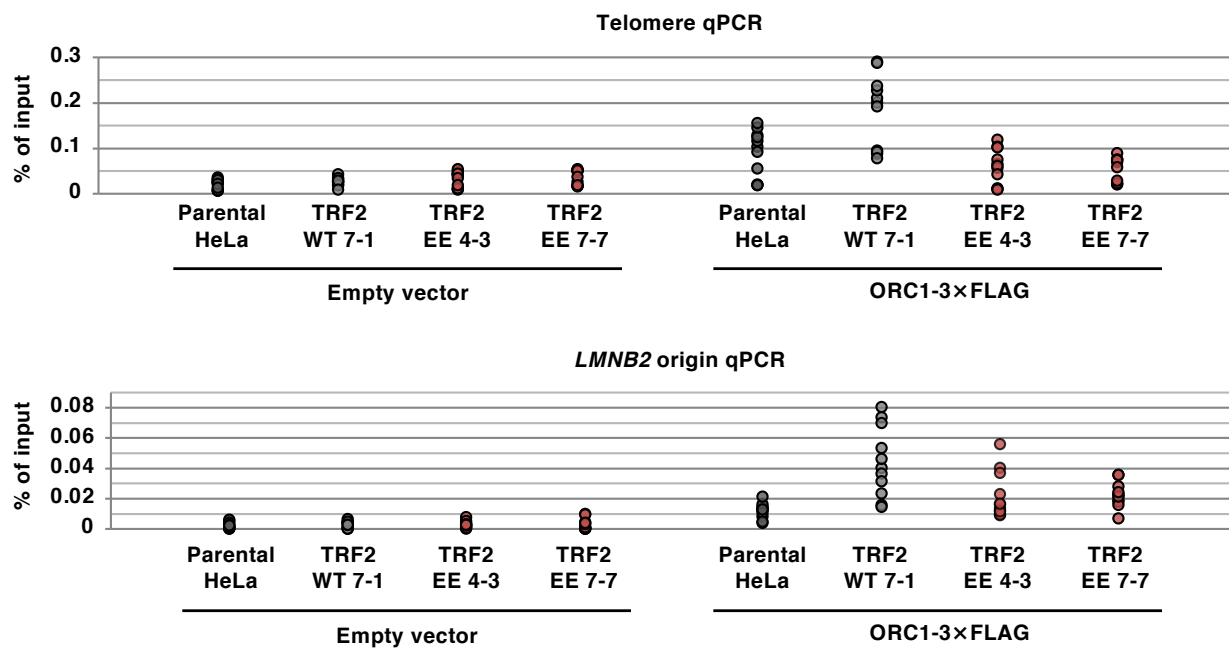**B**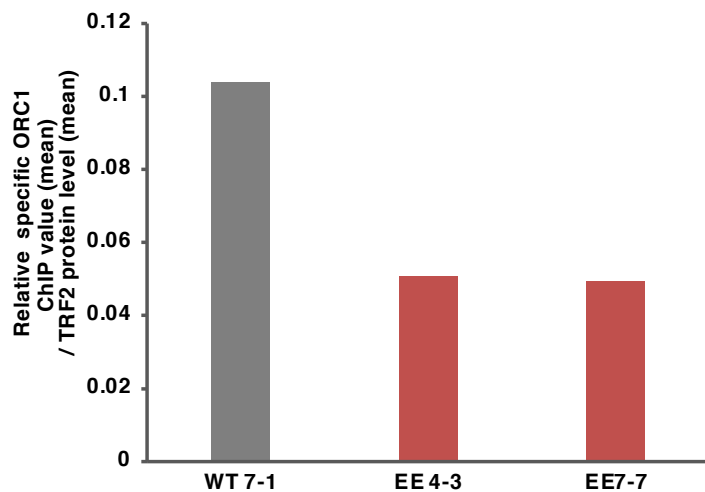**Supplementary Figure S2. Higa et al.**

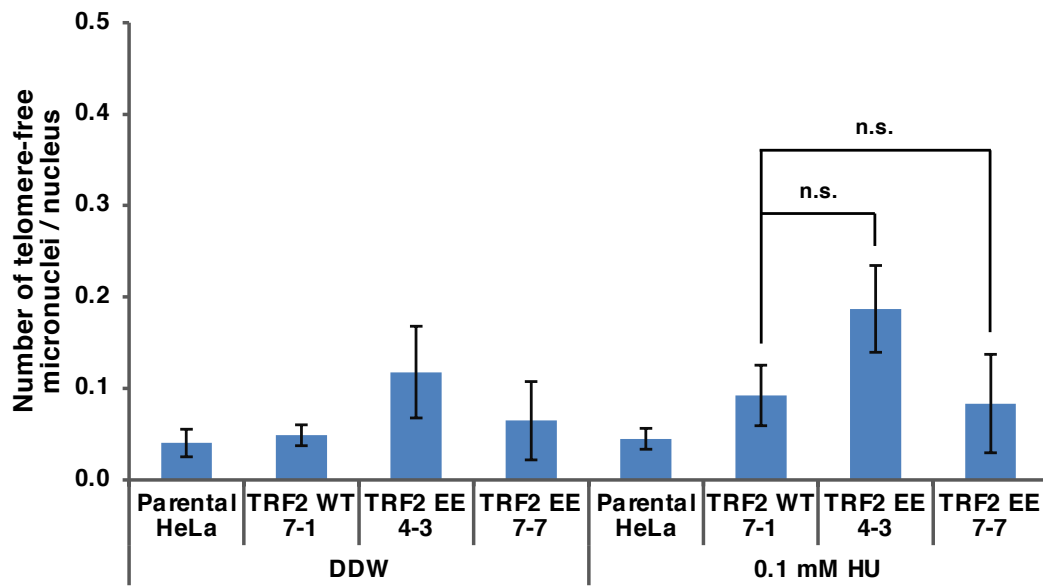

Supplementary Figure S3. Higa et al.

| Prey                | Bait                   | LacI foci <sup>a</sup> | Co-loc. foci <sup>b</sup> | Co-loc. freq. (%) <sup>c</sup> | $\chi^2$ -test <sup>d</sup> |
|---------------------|------------------------|------------------------|---------------------------|--------------------------------|-----------------------------|
| ORC1-3xFLAG         | HA-LacI                | 198                    | 4                         | 2.0                            |                             |
|                     | TRF2 $\Delta$ Myb-LacI | 172                    | 78                        | 45.3                           | ***                         |
| ORC1 (L229A)-3xFLAG | HA-LacI                | 145                    | 6                         | 4.1                            |                             |
|                     | TRF2 $\Delta$ Myb-LacI | 154                    | 72                        | 47.8                           | ***                         |

**Supplementary Figure S4. Higa et al.**



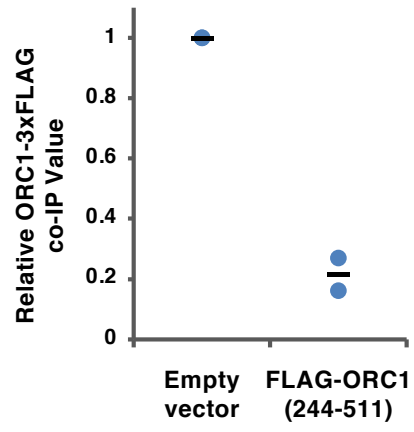

**Supplementary Figure S5. Higa et al.**

**A**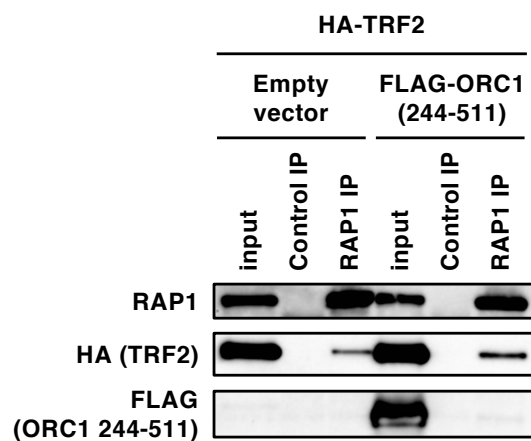**B**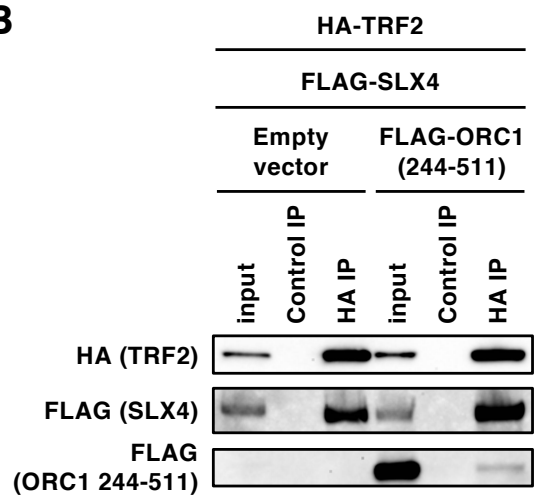

Supplementary Figure S6. Higa et al.

Experiment 1

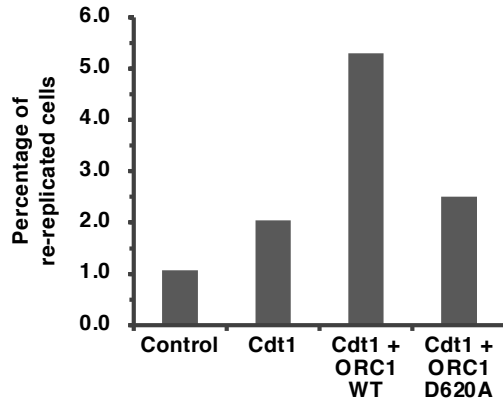

|                     |   |   |   |   |
|---------------------|---|---|---|---|
| T7-Cdt1             | - | + | + | + |
| ORC1 (WT)-3xFLAG    | - | - | + | - |
| ORC1 (D620A)-3xFLAG | - | - | - | + |

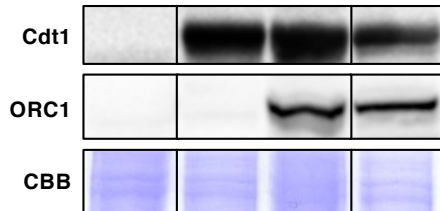

Experiment 2

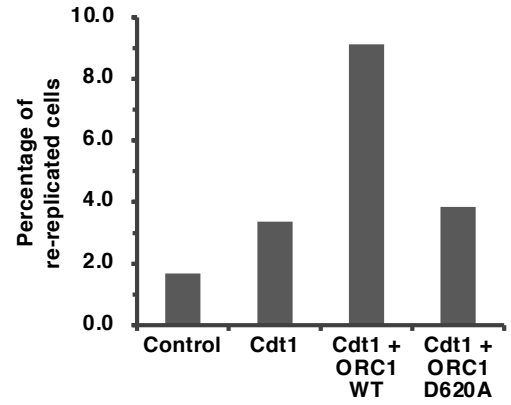

|                     |   |   |   |   |
|---------------------|---|---|---|---|
| T7-Cdt1             | - | + | + | + |
| ORC1 (WT)-3xFLAG    | - | - | + | - |
| ORC1 (D620A)-3xFLAG | - | - | - | + |

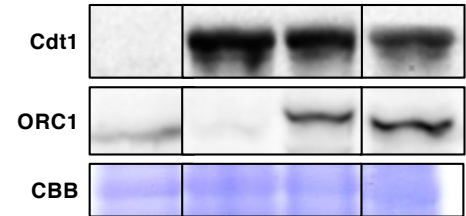

Supplementary Figure S7. Higa et al.

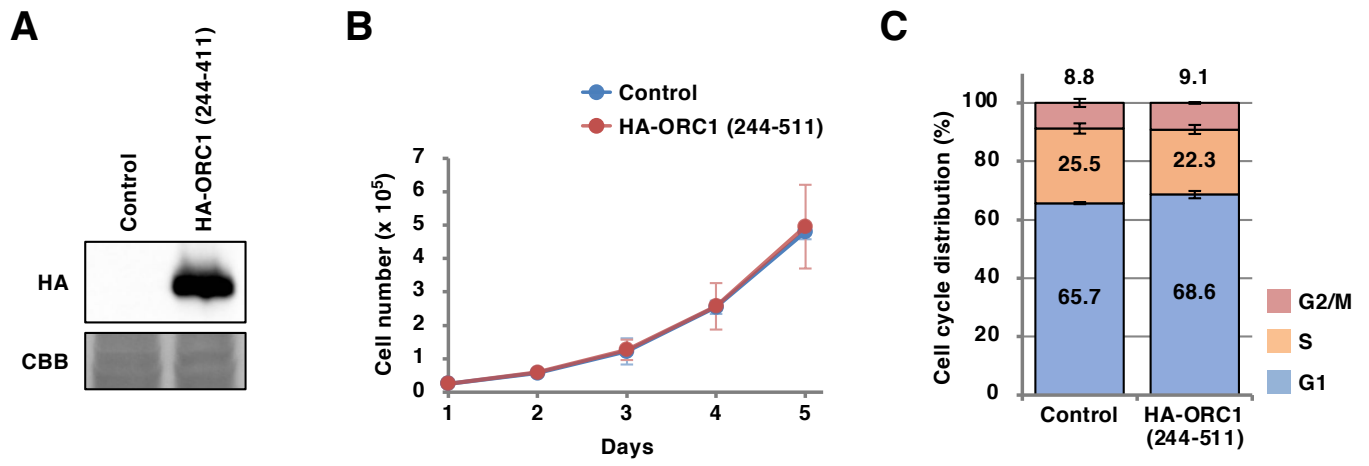

Supplementary Figure S8. Higa et al.

**ORC1-3xFLAG ChIP - qPCR**

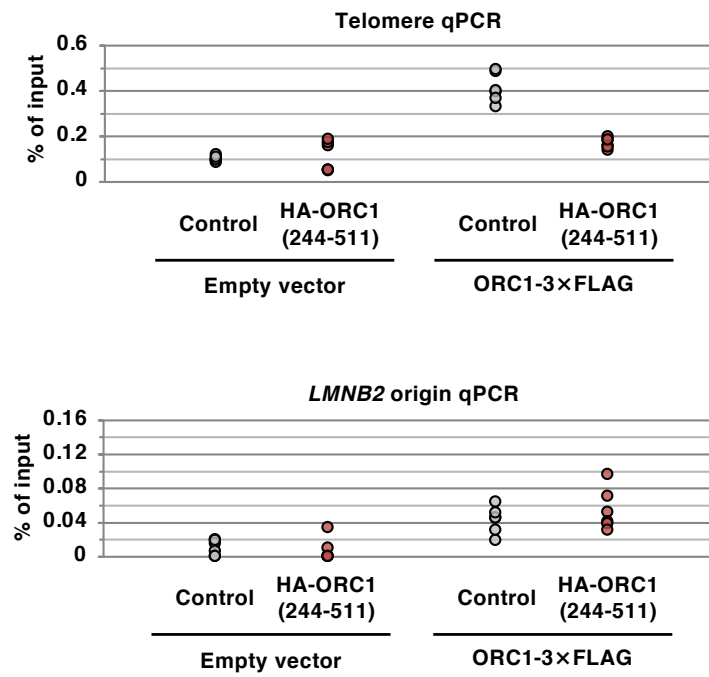

**Supplementary Figure S9. Higa et al.**

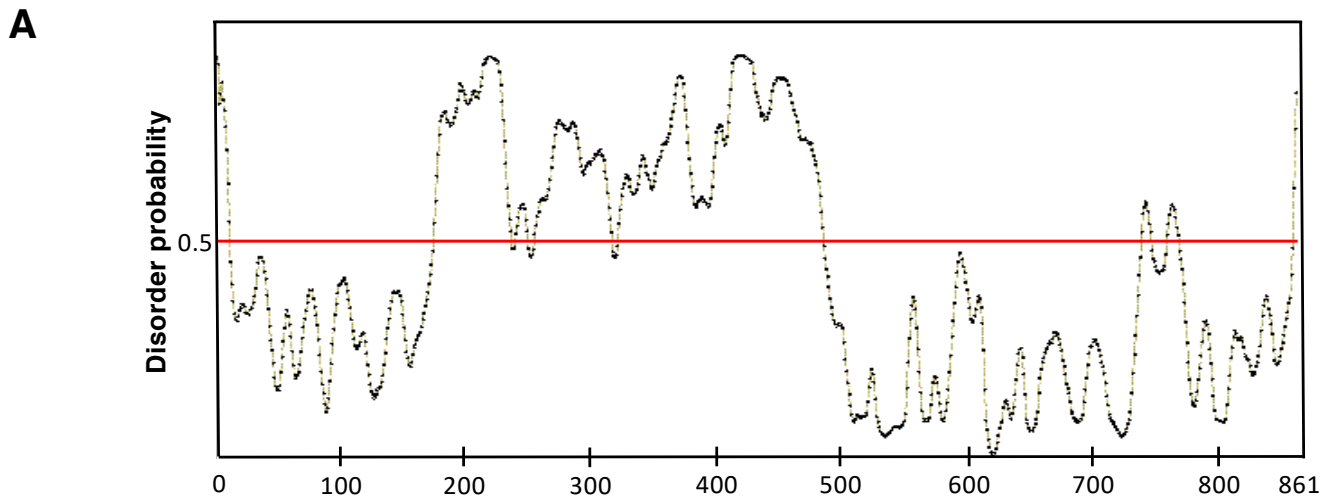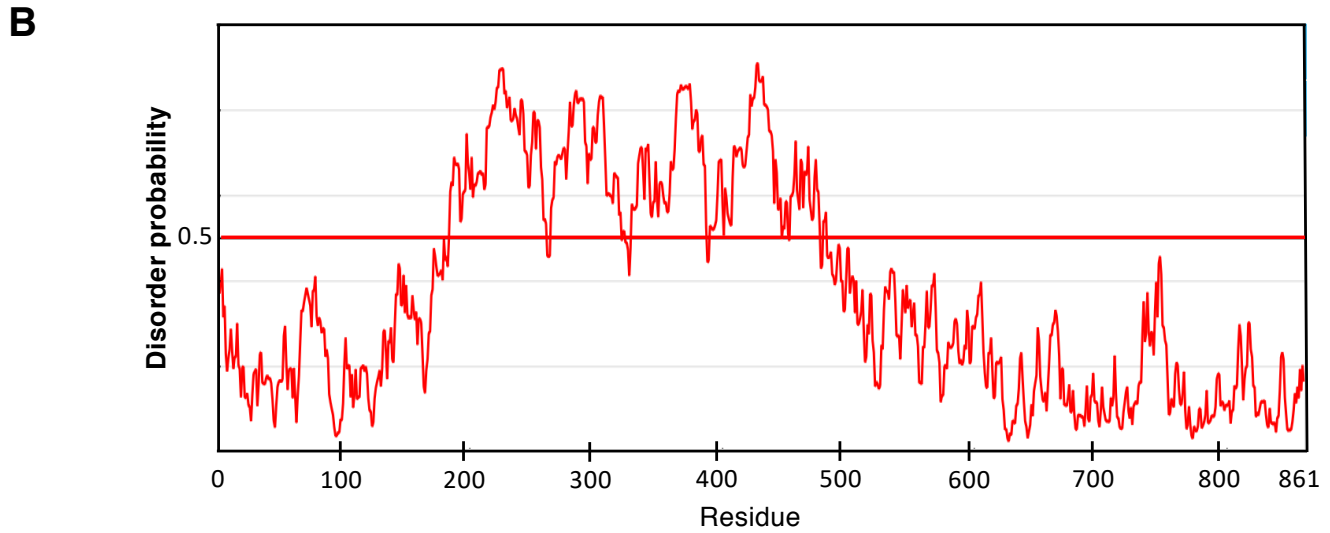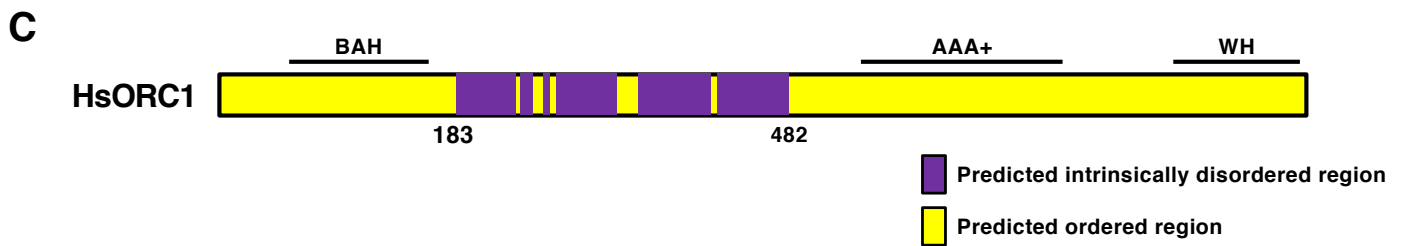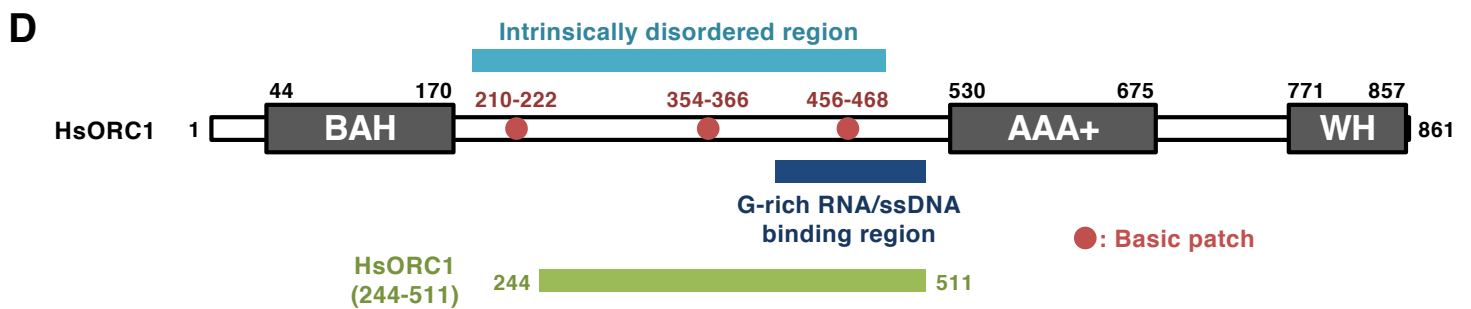

Supplementary Figure S10. Higa et al.

Supplementary Table S1. Compliance of qPCR experiments with the MIQE guidelines.

| ITEM TO CHECK                                                        | IMPORTANCE | CHECKLIST | COMMENTS                                                                                                                                                                                                                                                                                                                                           |
|----------------------------------------------------------------------|------------|-----------|----------------------------------------------------------------------------------------------------------------------------------------------------------------------------------------------------------------------------------------------------------------------------------------------------------------------------------------------------|
| <b>EXPERIMENTAL DESIGN</b>                                           |            |           |                                                                                                                                                                                                                                                                                                                                                    |
| Definition of experimental and control groups                        | E          | ✓         | <b>Figs 3E, 7B, S2 and S9: Experimental groups:</b> ORC1-3×FLAG ChIP; <b>Control groups:</b> empty vector ChIP. <b>Figs 3H and 7C: Experimental groups:</b> anti-MCM7 ChIP; <b>Control groups:</b> Rabbit IgG ChIP.                                                                                                                                |
| Number within each group                                             | E          | ✓         | <b>Figs 3E and S2:</b> n=9; <b>Fig 3H:</b> n=4; <b>Figs 7B, C, and S9:</b> n=6.                                                                                                                                                                                                                                                                    |
| Assay carried out by core lab or investigator's lab?                 | D          | ✓         | Investigator's lab                                                                                                                                                                                                                                                                                                                                 |
| Acknowledgement of authors' contributions                            | D          | ✓         | MH, YM, and JF performed qPCR.                                                                                                                                                                                                                                                                                                                     |
| <b>SAMPLE</b>                                                        |            |           |                                                                                                                                                                                                                                                                                                                                                    |
| Description                                                          | E          | ✓         | Tissue culture cells                                                                                                                                                                                                                                                                                                                               |
| Volume/mass of sample processed                                      | D          | ✓         | 6×10 <sup>6</sup> cells / antibody                                                                                                                                                                                                                                                                                                                 |
| Microdissection or macrodissection                                   | E          | ✓         | Not applicable                                                                                                                                                                                                                                                                                                                                     |
| Processing procedure                                                 | E          | ✓         | Not applicable                                                                                                                                                                                                                                                                                                                                     |
| If frozen - how and how quickly?                                     | E          | ✓         | Not applicable                                                                                                                                                                                                                                                                                                                                     |
| If fixed - with what, how quickly?                                   | E          | ✓         | Not applicable                                                                                                                                                                                                                                                                                                                                     |
| Sample storage conditions and duration (especially for FFPE samples) | E          | ✓         | Not applicable                                                                                                                                                                                                                                                                                                                                     |
| <b>NUCLEIC ACID EXTRACTION</b>                                       |            |           |                                                                                                                                                                                                                                                                                                                                                    |
| Procedure and/or instrumentation                                     | E          | ✓         | After formaldehyde reversal, the samples were serially treated with DNase-free RNase A (final 5 µg, Invitrogen) and Proteinase K (final 50 µg/ml, Roche). The DNA was phenol:chloroform (Nacalai tesque) extracted, ethanol (Nacalai tesque) precipitated in the presence of 1 µl of glycogen (Nacalai tesque), and dissolved in Tris-EDTA buffer. |
| Name of kit and details of any modifications                         | E          | ✓         | We did not use any kit.                                                                                                                                                                                                                                                                                                                            |
| Source of additional reagents used                                   | D          | ✓         | Not applicable                                                                                                                                                                                                                                                                                                                                     |
| Details of DNase or RNase treatment                                  | E          | ✓         | RNase A (5 µg, Invitrogen) was added and incubated at 37°C for 30 min.                                                                                                                                                                                                                                                                             |
| Contamination assessment (DNA or RNA)                                | E          | ✓         | Not performed                                                                                                                                                                                                                                                                                                                                      |
| Nucleic acid quantification                                          | E          | ✓         | Using absorbance at 260 nm                                                                                                                                                                                                                                                                                                                         |
| Instrument and method                                                | E          | ✓         | Nanodrop (Thermo Scientific)                                                                                                                                                                                                                                                                                                                       |
| Purity (A260/A280)                                                   | D          | ✓         | 1.8 - 1.9                                                                                                                                                                                                                                                                                                                                          |
| Yield                                                                | D          | ✓         | The mean yield of input DNA was 170 µg/ml.                                                                                                                                                                                                                                                                                                         |
| RNA integrity method/instrument                                      | E          | ✓         | Not applicable                                                                                                                                                                                                                                                                                                                                     |
| RIN/RQI or Cq of 3' and 5' transcripts                               | E          | ✓         | Not applicable                                                                                                                                                                                                                                                                                                                                     |
| Electrophoresis traces                                               | D          | ✓         | Not applicable                                                                                                                                                                                                                                                                                                                                     |
| Inhibition testing (Cq dilutions, spike or other)                    | E          | ✓         | Not applicable                                                                                                                                                                                                                                                                                                                                     |
| <b>REVERSE TRANSCRIPTION</b>                                         |            |           |                                                                                                                                                                                                                                                                                                                                                    |
| Complete reaction conditions                                         | E          | ✓         | Not applicable                                                                                                                                                                                                                                                                                                                                     |
| Amount of RNA and reaction volume                                    | E          | ✓         | Not applicable                                                                                                                                                                                                                                                                                                                                     |
| Priming oligonucleotide (if using GSP) and concentration             | E          | ✓         | Not applicable                                                                                                                                                                                                                                                                                                                                     |
| Reverse transcriptase and concentration                              | E          | ✓         | Not applicable                                                                                                                                                                                                                                                                                                                                     |
| Temperature and time                                                 | E          | ✓         | Not applicable                                                                                                                                                                                                                                                                                                                                     |
| Manufacturer of reagents and catalogue numbers                       | D          | ✓         | Not applicable                                                                                                                                                                                                                                                                                                                                     |
| Cqs with and without RT                                              | D          | ✓         | Not applicable                                                                                                                                                                                                                                                                                                                                     |
| Storage conditions of cDNA                                           | D          | ✓         | Not applicable                                                                                                                                                                                                                                                                                                                                     |
| <b>qPCR TARGET INFORMATION</b>                                       |            |           |                                                                                                                                                                                                                                                                                                                                                    |
| If multiplex, efficiency and LOD of each assay.                      | E          | ✓         | Not applicable                                                                                                                                                                                                                                                                                                                                     |
| Sequence accession number                                            | E          | ✓         | <b>LMNB2:</b> NM_032737.3                                                                                                                                                                                                                                                                                                                          |
| Location of amplicon                                                 | D          | ✓         | See Cawthon, Nucleic Acids Research, 30: e47, 2002; Sugimoto et al, Nucleic Acids Research, 43: 5898-5911, 2015.                                                                                                                                                                                                                                   |
| Amplicon length                                                      | E          | ✓         | <b>Telomere:</b> 76 bp; <b>LMNB2 ori:</b> 232 bp.                                                                                                                                                                                                                                                                                                  |
| <i>In silico</i> specificity screen (BLAST, etc)                     | E          | ✓         | We confirmed all primers by BLAST.                                                                                                                                                                                                                                                                                                                 |
| Pseudogenes, retropseudogenes or other homologs?                     | D          |           |                                                                                                                                                                                                                                                                                                                                                    |
| Sequence alignment                                                   | D          |           |                                                                                                                                                                                                                                                                                                                                                    |
| Secondary structure analysis of amplicon                             | D          |           |                                                                                                                                                                                                                                                                                                                                                    |
| Location of each primer by exon or intron (if applicable)            | E          | ✓         | Not applicable                                                                                                                                                                                                                                                                                                                                     |
| What splice variants are targeted?                                   | E          | ✓         | Not applicable                                                                                                                                                                                                                                                                                                                                     |
| <b>qPCR OLIGONUCLEOTIDES</b>                                         |            |           |                                                                                                                                                                                                                                                                                                                                                    |
| Primer sequences                                                     | E          | ✓         | <b>Telomere Forward:</b> GGTTTTGAGGGTGAGGGTGAGGGTGAGGGTGAGGGT, <b>Reverse:</b> TCCCGACTATCCCTATCCCTATCCCTATCCCTATCCCTA; <b>LMNB2 ori Forward:</b> GGCTGGCATGGACTTTCATTTAG, <b>Reverse:</b> GTGGAGGGATCTTTCTTAGACATC.                                                                                                                               |

|                                                           |   |   |                                                                                                                                                                                                                                                                                                                                                                                       |
|-----------------------------------------------------------|---|---|---------------------------------------------------------------------------------------------------------------------------------------------------------------------------------------------------------------------------------------------------------------------------------------------------------------------------------------------------------------------------------------|
| RTPrimerDB Identification Number                          | D | ✓ | Not applicable                                                                                                                                                                                                                                                                                                                                                                        |
| Probe sequences                                           | D | ✓ | Not applicable                                                                                                                                                                                                                                                                                                                                                                        |
| Location and identity of any modifications                | E | ✓ | Not applicable                                                                                                                                                                                                                                                                                                                                                                        |
| Manufacturer of oligonucleotides                          | D | ✓ | <b>Telomere:</b> SIGMA; <b>LMNB2 ori:</b> FASMAC                                                                                                                                                                                                                                                                                                                                      |
| Purification method                                       | D | ✓ | <b>Telomere:</b> OPC purification; <b>LMNB2 ori:</b> Reversed-phase chromatography                                                                                                                                                                                                                                                                                                    |
| <b>qPCR PROTOCOL</b>                                      |   |   |                                                                                                                                                                                                                                                                                                                                                                                       |
| Complete reaction conditions                              | E | ✓ | PCR reactions were performed in a CFX96 Touch Real-Time PCR Detection System (BIO-RAD) using SYBR or TB Green Premix EX Taq II (Takara) in final volume of 25 µl. Reaction mix consisted of sterile H <sub>2</sub> O MilliQ, 12.5 µl 2× SYBR or TB Green Premix EX Taq II, 1 µl 5 µM each forward and reverse primers and 1 µl ChIPed DNA.                                            |
| Reaction volume and amount of cDNA/DNA                    | E | ✓ | Reaction volume: 25 µl; amount of ChIPed DNA: 1 µl                                                                                                                                                                                                                                                                                                                                    |
| Primer, (probe), Mg <sup>++</sup> and dNTP concentrations | E | ✓ | 200 nM primers                                                                                                                                                                                                                                                                                                                                                                        |
| Polymerase identity and concentration                     | E | ✓ | Manufacturer's proprietary                                                                                                                                                                                                                                                                                                                                                            |
| Buffer/kit identity and manufacturer                      | E | ✓ | SYBR or TB Green Premix EX Taq II (Takara)                                                                                                                                                                                                                                                                                                                                            |
| Exact chemical constitution of the buffer                 | D | ✓ | Manufacturer's proprietary                                                                                                                                                                                                                                                                                                                                                            |
| Additives (SYBR Green I, DMSO, etc.)                      | E | ✓ | No additives                                                                                                                                                                                                                                                                                                                                                                          |
| Manufacturer of plates/tubes and catalog number           | D | ✓ | 96-well plates (SKPCR96C) and PCR String Caps (SKPCR8FC), both provided by SEIKO Co. LTD (Japan).                                                                                                                                                                                                                                                                                     |
| Complete thermocycling parameters                         | E | ✓ | <b>Telomere:</b> 30 sec at 95 °C; and 40 cycles at 95 °C for 15 sec and at 54 °C for 2 min.<br><b>LMNB2 ori:</b> 1 min at 95 °C; five cycles at 95 °C for 30 sec, at 66.9 °C for 30 sec, and at 72 °C for 30 sec, five cycles at 95 °C for 30 sec, at 64.9 °C for 30 sec, and at 72 °C for 30 sec, and 50 cycles at 95 °C for 30 sec, at 62.9 °C for 30 sec, and at 72 °C for 30 sec. |
| Reaction setup (manual/robotic)                           | D | ✓ | Manual setup                                                                                                                                                                                                                                                                                                                                                                          |
| Manufacturer of qPCR instrument                           | E | ✓ | CFX96 Touch Real-Time PCR Detection System (BIO-RAD)                                                                                                                                                                                                                                                                                                                                  |
| <b>qPCR VALIDATION</b>                                    |   |   |                                                                                                                                                                                                                                                                                                                                                                                       |
| Evidence of optimisation (from gradients)                 | D | ✓ | None                                                                                                                                                                                                                                                                                                                                                                                  |
| Specificity (gel, sequence, melt, or digest)              | E | ✓ | Melting curve analysis, ramping from 72 °C to 95 °C in step of 0.5 °C, where fluorescence data are measured continuously. Specific amplification was confirmed in 3% agarose gel electrophoresis stained with ethidium bromide. No template controls were run for each amplicon to detect unspecific amplification and primer dimerization.                                           |
| For SYBR Green I, Cq of the NTC                           | E | ✓ | <b>Telomere:</b> > 25; <b>LMNB2 ori:</b> > 40 or no amplification                                                                                                                                                                                                                                                                                                                     |
| Standard curves with slope and y-intercept                | E | ✓ | Representative values are shown.<br><b>Telomere:</b> y = -3.317x + 18.583<br><b>LMNB2 ori:</b> y = -3.449x + 18.262                                                                                                                                                                                                                                                                   |
| PCR efficiency calculated from slope                      | E | ✓ | <b>Telomere:</b> 79.9 - 155.2%; <b>LMNB2 ori:</b> 76.8 - 125.9%                                                                                                                                                                                                                                                                                                                       |
| Confidence interval for PCR efficiency or standard error  | D |   |                                                                                                                                                                                                                                                                                                                                                                                       |
| r <sup>2</sup> of standard curve                          | E | ✓ | <b>Telomere:</b> 0.807 - 1.0; <b>LMNB2 ori:</b> 0.984 - 1.0                                                                                                                                                                                                                                                                                                                           |
| Linear dynamic range                                      | E | ✓ | The Cq values of unknown samples fell within the linear range.                                                                                                                                                                                                                                                                                                                        |
| Cq variation at lower limit                               | E | ✓ | Not performed                                                                                                                                                                                                                                                                                                                                                                         |
| Confidence intervals throughout range                     | D | ✓ | Not performed                                                                                                                                                                                                                                                                                                                                                                         |
| Evidence for limit of detection                           | E | ✓ | Not performed                                                                                                                                                                                                                                                                                                                                                                         |
| If multiplex, efficiency and LOD of each assay.           | E | ✓ | Not applicable                                                                                                                                                                                                                                                                                                                                                                        |
| <b>DATA ANALYSIS</b>                                      |   |   |                                                                                                                                                                                                                                                                                                                                                                                       |
| qPCR analysis program (source, version)                   | E | ✓ | CFX Manager Software (BIO-RAD), version 3.1                                                                                                                                                                                                                                                                                                                                           |
| Cq method determination                                   | E | ✓ | The CFX software Single Threshold mode was used to determine Cq for each locus.                                                                                                                                                                                                                                                                                                       |
| Outlier identification and disposition                    | E | ✓ | None of the Cq values was discarded.                                                                                                                                                                                                                                                                                                                                                  |
| Results of NTCs                                           | E | ✓ | <b>Telomere:</b> > 25; <b>LMNB2 ori:</b> > 40 or no amplification                                                                                                                                                                                                                                                                                                                     |
| Justification of number and choice of reference genes     | E | ✓ | Not applicable                                                                                                                                                                                                                                                                                                                                                                        |
| Description of normalisation method                       | E | ✓ | Standard curve quantification                                                                                                                                                                                                                                                                                                                                                         |
| Number and concordance of biological replicates           | D | ✓ | <b>Figs 3E and S2:</b> n=3; <b>Fig 3H:</b> n=4; <b>Figs 7B, C and S9:</b> n=2                                                                                                                                                                                                                                                                                                         |
| Number and stage (RT or qPCR) of technical replicates     | E | ✓ | qPCR reactions were performed in triplicate.                                                                                                                                                                                                                                                                                                                                          |
| Repeatability (intra-assay variation)                     | E | ✓ | Standard deviation of replicates: <b>Experimental groups:</b> 0.019 - 1.643 Cq; <b>Control groups:</b> 0.016 - 10.955 Cq                                                                                                                                                                                                                                                              |
| Reproducibility (inter-assay variation, %CV)              | D |   |                                                                                                                                                                                                                                                                                                                                                                                       |
| Power analysis                                            | D |   |                                                                                                                                                                                                                                                                                                                                                                                       |
| Statistical methods for result significance               | E | ✓ | Two-tailed Student's t-test                                                                                                                                                                                                                                                                                                                                                           |
| Software (source, version)                                | E | ✓ | Microsoft Excel for Mac, version 16.43                                                                                                                                                                                                                                                                                                                                                |
| Cq or raw data submission using RDML                      | D |   |                                                                                                                                                                                                                                                                                                                                                                                       |

E: essential information; D: desirable information.



Fig1\_Source\_data

| Figure 1B               | Experiment 1 |                |               | Experiment 2 |               |               |
|-------------------------|--------------|----------------|---------------|--------------|---------------|---------------|
|                         | # Lacl foci  | # Co-loc. foci | Co-loc. freq. | # Lacl foci  | # Co-loc foci | Co-loc. freq. |
| ORC1                    |              |                |               |              |               |               |
| HA-Lacl                 | 94           | 6              | 6.4           | 88           | 1             | 1.1           |
| TRF2 (45-244)-Lacl      | 64           | 24             | 37.5          | 88           | 29            | 33.0          |
| TRF2 (45-244) YG-Lacl   | 65           | 8              | 12.3          | 127          | 19            | 15.0          |
| TRF2 (45-244) VP-Lacl   | 65           | 9              | 13.8          | 93           | 10            | 10.8          |
| TRF2 (45-244) KEHT-Lacl | 61           | 16             | 26.2          | 148          | 25            | 16.7          |
| TRF2 (45-244) SR-Lacl   | 59           | 27             | 45.8          | 150          | 39            | 26.0          |
| TRF2 (45-244) EE-Lacl   | 64           | 5              | 7.8           | 138          | 7             | 5.0           |
| TRF2 (45-244) SM-Lacl   | 70           | 13             | 18.8          | 121          | 11            | 9.1           |

| Figure 1C             | Experiment 1 |                |               | Experiment 2 |               |               |
|-----------------------|--------------|----------------|---------------|--------------|---------------|---------------|
|                       | # Lacl foci  | # Co-loc. foci | Co-loc. freq. | # Lacl foci  | # Co-loc foci | Co-loc. freq. |
| ORC2                  |              |                |               |              |               |               |
| HA-Lacl               | 102          | 0              | 0             | 96           | 4             | 4.2           |
| TRF2 (45-244)-Lacl    | 72           | 9              | 12.5          | 66           | 12            | 18.2          |
| TRF2 (45-244) EE-Lacl | 75           | 2              | 2.7           | 80           | 5             | 6.3           |
|                       |              |                |               |              |               |               |
| ORC3                  |              |                |               |              |               |               |
| HA-Lacl               | 69           | 5              | 7.2           | 85           | 4             | 4.7           |
| TRF2 (45-244)-Lacl    | 69           | 15             | 21.7          | 79           | 17            | 21.5          |
| TRF2 (45-244) EE-Lacl | 72           | 5              | 6.9           | 76           | 9             | 11.8          |

| Figure 1D   | Experiment 1 | Experiment 2 |
|-------------|--------------|--------------|
| GST         | 0.112        | 0.186        |
| GST-TRF2 WT | 1.000        | 1.000        |
| GST-TRF2 YG | 0.233        | 0.175        |
| GST-TRF2 VP | 0.063        | 0.230        |
| GST-TRF2 EE | 0.216        | 0.251        |
| GST-TRF2 SM | 0.400        | 0.183        |

| Figure 1E  | Experiment 1 | Experiment 2 |
|------------|--------------|--------------|
| HA-TRF2    | 1.000        | 1.000        |
| HA-TRF2 EE | 0.013        | 0.310        |

Fig2\_Source\_data

| Figure 2B             | Experiment 1 |                |               | Experiment 2 |               |               | Experiment 3 |               |               |
|-----------------------|--------------|----------------|---------------|--------------|---------------|---------------|--------------|---------------|---------------|
|                       | # Lacl foci  | # Co-loc. foci | Co-loc. freq. | # Lacl foci  | # Co-loc foci | Co-loc. freq. | # Lacl foci  | # Co-loc foci | Co-loc. freq. |
| HA-Lacl               | 71           | 0              | 0.0           | 52           | 1             | 1.9           | 46           | 2             | 4.3           |
| TRF2 (45-244)-Lacl    | 58           | 35             | 60.3          | 61           | 51            | 83.6          | 30           | 30            | 100.0         |
| TRF2 (45-244) YG-Lacl |              |                |               | 69           | 54            | 78.3          | 76           | 64            | 84.2          |
| TRF2 (45-244) VP-Lacl |              |                |               | 64           | 48            | 75.0          | 81           | 68            | 84.0          |
| TRF2 (45-244) EE-Lacl | 55           | 29             | 52.7          | 35           | 30            | 85.7          | 83           | 73            | 88.0          |
| TRF2 (45-244) SM-Lacl |              |                |               | 81           | 63            | 77.8          | 73           | 64            | 87.7          |

| Figure 2E  | Experiment 1 | Experiment 2 |
|------------|--------------|--------------|
| HA-TRF2 WT | 1.000        | 1.000        |
| HA-TRF2 YG | 0.157        | 0.502        |
| HA-TRF2 VP | 0.086        | 0.073        |
| HA-TRF2 EE | 0.225        | 0.579        |
| HA-TRF2 SM | 0.867        | 0.881        |

Fig3\_Source\_data

| Figure 3E     | 1      | 2      | 3      | 4      | 5      | 6       | 7      | 8      | 9      |
|---------------|--------|--------|--------|--------|--------|---------|--------|--------|--------|
| Parental HeLa | 7.4972 | 8.7753 | 9.9652 | 7.6438 | 9.3334 | 10.1390 | 1.8399 | 2.1614 | 1.8486 |
| TRF2 WT 7-1   | 4.1533 | 4.3894 | 4.8020 | 3.6273 | 3.5761 | 2.8797  | 3.8329 | 4.2363 | 4.0794 |
| TRF2 EE 4-3   | 2.1040 | 3.0287 | 1.2714 | 1.7510 | 1.3854 | 1.3354  | 0.0000 | 0.1098 | 0.0000 |
| TRF2 EE 7-7   | 1.4140 | 1.7200 | 1.7182 | 1.5237 | 0.9500 | 0.9214  | 0.1417 | 0.2378 | 0.2806 |

| Figure 3G     | 1     |       |       | 2     |       |       | 3     |       |       |
|---------------|-------|-------|-------|-------|-------|-------|-------|-------|-------|
|               | G1    | S     | G2/M  | G1    | S     | G2/M  | G1    | S     | G2/M  |
| Parental HeLa | 62.45 | 24.38 | 13.17 | 56.83 | 27.36 | 15.81 | 69.33 | 20.33 | 10.34 |
| TRF2 WT 7-1   | 64.36 | 24.76 | 10.88 | 60.07 | 24.98 | 14.95 | 70.77 | 18.49 | 10.74 |
| TRF2 EE 4-3   | 57.84 | 29.38 | 12.78 | 57.11 | 29.18 | 13.71 | 66.67 | 21.64 | 11.69 |
| TRF2 EE 7-7   | 54    | 32.44 | 13.56 | 55.68 | 28.21 | 16.11 | 64.39 | 25.09 | 10.53 |

| Figure 3H |               | 1        | 2        | 3        | 4        |
|-----------|---------------|----------|----------|----------|----------|
| IgG       | Parental HeLa | 0.003069 | 0.004394 | 0.010902 | 0.002736 |
|           | TRF2 WT 7-1   | 0.003873 | 0.003773 | 0.011045 | 0.006595 |
|           | TRF2 EE 4-3   | 0.006433 | 0.004397 | 0.004250 | 0.002143 |
|           | TRF2 EE 7-7   | 0.005340 | 0.002159 | 0.000890 | 0.004575 |
| MCM7 IP   | Parental HeLa | 0.099381 | 0.088621 | 0.086882 | 0.077056 |
|           | TRF2 WT 7-1   | 0.105150 | 0.080518 | 0.069455 | 0.132258 |
|           | TRF2 EE 4-3   | 0.044869 | 0.070257 | 0.069518 | 0.043968 |
|           | TRF2 EE 7-7   | 0.060003 | 0.045300 | 0.043766 | 0.066415 |

| Figure 3I |               | 1        | 2        | 3        | 4        |
|-----------|---------------|----------|----------|----------|----------|
| IgG       | Parental HeLa | 0.005945 | 0.002547 | 0.040813 | 0.075808 |
|           | TRF2 WT 7-1   | 0.000000 | 0.001086 | 0.050608 | 0.007092 |
|           | TRF2 EE 4-3   | 0.002298 | 0.007292 | 0.034525 | 0.023157 |
|           | TRF2 EE 7-7   | 0.010966 | 0.011411 | 0.042890 | 0.026624 |
| MCM7 IP   | Parental HeLa | 0.076269 | 0.130012 | 0.145099 | 0.141218 |
|           | TRF2 WT 7-1   | 0.055259 | 0.077773 | 0.079508 | 0.142851 |
|           | TRF2 EE 4-3   | 0.044368 | 0.078830 | 0.088061 | 0.052661 |
|           | TRF2 EE 7-7   | 0.077290 | 0.098867 | 0.065466 | 0.067369 |

Fig4\_Source\_data

| Figure 4B     |           | Cells with $\geq 10$ TIFs |    |
|---------------|-----------|---------------------------|----|
|               |           | 1                         | 2  |
| Parental HeLa | DDW       | 0                         | 0  |
|               | 0.1 mM HU | 1                         | 3  |
| TRF2 WT 7-1   | DDW       | 7                         | 4  |
|               | 0.1 mM HU | 4                         | 12 |
| TRF2 EE 4-3   | DDW       | 1                         | 7  |
|               | 0.1 mM HU | 12                        | 15 |
| TRF2 EE 7-7   | DDW       | 7                         | 7  |
|               | 0.1 mM HU | 14                        | 17 |

| Figure 4D |               | 1      | 2      | 3      |
|-----------|---------------|--------|--------|--------|
| DDW       | Parental HeLa | 0.0515 | 0.1341 | 0.0906 |
|           | TRF2 WT 7-1   | 0.1373 | 0.0750 | 0.0383 |
|           | TRF2 EE 4-3   | 0.1051 | 0.1307 | 0.1594 |
|           | TRF2 EE 7-7   | 0.1309 | 0.0569 | 0.1327 |
| 0.1 mM HU | Parental HeLa | 0.1555 | 0.2655 | 0.2059 |
|           | TRF2 WT 7-1   | 0.2849 | 0.2348 | 0.1484 |
|           | TRF2 EE 4-3   | 0.4640 | 0.3880 | 0.3418 |
|           | TRF2 EE 7-7   | 0.3761 | 0.3537 | 0.3271 |

Fig5\_Source\_data

| Figure 5B          |                     | Experiment 1 |                |               | Experiment 2 |               |               | Experiment 3 |               |               |
|--------------------|---------------------|--------------|----------------|---------------|--------------|---------------|---------------|--------------|---------------|---------------|
|                    |                     | # Lacl foci  | # Co-loc. foci | Co-loc. freq. | # Lacl foci  | # Co-loc foci | Co-loc. freq. | # Lacl foci  | # Co-loc foci | Co-loc. freq. |
| HA-Lacl            | FLAG-ORC1 (2-511)   | 51           | 5              | 9.8           | 56           | 5             | 8.9           | 50           | 2             | 4.0           |
| TRF2 (45-244)-Lacl | FLAG-ORC1 (2-511)   | 43           | 30             | 70.0          | 31           | 24            | 77.4          | 38           | 28            | 73.7          |
|                    | FLAG-ORC1 (2-325)   | 41           | 3              | 7.3           |              |               |               | 72           | 4             | 5.6           |
|                    | FLAG-ORC1 (2-244)   | 40           | 4              | 10            |              |               |               | 79           | 2             | 2.5           |
|                    | FLAG-ORC1 (2-85)    | 62           | 1              | 1.6           |              |               |               | 91           | 1             | 1.1           |
|                    | FLAG-ORC1 (244-511) |              |                |               | 63           | 52            | 82.5          | 62           | 60            | 96.8          |
|                    | FLAG-ORC1 (325-511) |              |                |               | 71           | 32            | 45.1          | 90           | 43            | 47.8          |

| Figure 5D          |                               | Experiment 1 |                |               | Experiment 2 |               |               | Experiment 3 |               |               |
|--------------------|-------------------------------|--------------|----------------|---------------|--------------|---------------|---------------|--------------|---------------|---------------|
|                    |                               | # Lacl foci  | # Co-loc. foci | Co-loc. freq. | # Lacl foci  | # Co-loc foci | Co-loc. freq. | # Lacl foci  | # Co-loc foci | Co-loc. freq. |
| HA-Lacl            | FLAG-ORC1 (full-length)       | 137          | 13             | 9.5           | 90           | 5             | 5.6           | 91           | 12            | 13.2          |
| TRF2 (45-244)-Lacl | FLAG-ORC1 (full-length)       | 136          | 33             | 24.0          | 63           | 15            | 24.0          | 91           | 28            | 31.0          |
|                    | FLAG-ORC1 ( $\Delta$ 326-510) | 112          | 2              | 1.8           | 65           | 6             | 9.2           | 78           | 12            | 15.0          |
|                    | FLAG-ORC1 ( $\Delta$ 386-510) | 58           | 13             | 22.0          | 58           | 6             | 10.0          | 104          | 6             | 5.8           |
|                    | FLAG-ORC1 ( $\Delta$ 411-510) |              |                |               | 68           | 6             | 8.8           | 110          | 6             | 5.5           |
|                    | FLAG-ORC1 ( $\Delta$ 446-510) | 64           | 16             | 25.0          | 140          | 25            | 18.0          |              |               |               |
|                    | FLAG-ORC1 ( $\Delta$ 411-445) |              |                |               | 125          | 18            | 14.0          | 113          | 19            | 17.0          |

Fig6\_Source\_data

| Figure 6B                      |                   | Experiment 1 |                |               | Experiment 2 |               |               |
|--------------------------------|-------------------|--------------|----------------|---------------|--------------|---------------|---------------|
|                                | HA-ORC1 (244-511) | # Lacl foci  | # Co-loc. foci | Co-loc. freq. | # Lacl foci  | # Co-loc foci | Co-loc. freq. |
| TRF2 (45-244)-Lacl + FLAG-ORC1 | -                 | 99           | 40             | 40.4          | 107          | 28            | 26.2          |
|                                | +                 | 112          | 20             | 17.8          | 98           | 12            | 12.2          |

| Figure 6E                        | 1    | 2    | 3    |
|----------------------------------|------|------|------|
| Control                          | 1.00 | 1.00 | 1.00 |
| Cdt1                             | 1.36 | 1.70 | 1.64 |
| Cdt1 + ORC1                      | 3.18 | 3.67 | 3.07 |
| Cdt1 + ORC1 + FLAG-ORC1(244-511) | 3.20 | 3.03 | 2.54 |

Fig7\_Source\_data

| Figure 7B        | 1     | 2     | 3     | 4    | 5    | 6    |
|------------------|-------|-------|-------|------|------|------|
| Control          | 17.20 | 17.60 | 10.50 | 6.79 | 6.93 | 6.09 |
| HA-ORC1(244-511) | 0.00  | 0.18  | 0.41  | 2.66 | 3.05 | 3.98 |

| Figure 7C |                   | 1        | 2        | 3        | 4        | 5        | 6        |
|-----------|-------------------|----------|----------|----------|----------|----------|----------|
| IgG       | Control           | 0.006126 | 0.006405 | 0.006505 | 0.010926 | 0.012694 | 0.013055 |
|           | HA-ORC1 (244-511) | 0.005103 | 0.004818 | 0.003669 | 0.002426 | 0.001971 | 0.001538 |
| MCM7 IP   | Control           | 0.098947 | 0.132881 | 0.127861 | 0.148822 | 0.103051 | 0.111091 |
|           | HA-ORC1 (244-511) | 0.036151 | 0.047339 | 0.045867 | 0.048472 | 0.044881 | 0.044714 |

| Figure 7D |                   | 1        | 2        |
|-----------|-------------------|----------|----------|
| IgG       | Control           | 0.033255 | 0.114720 |
|           | HA-ORC1 (244-511) | 0.025677 | 0.030497 |
| MCM7 IP   | Control           | 0.211553 | 0.458258 |
|           | HA-ORC1 (244-511) | 0.198998 | 0.340009 |

| Figure 7E         |           | Cells with $\geq 5$ TIFs |   |   |
|-------------------|-----------|--------------------------|---|---|
|                   |           | 1                        | 2 | 3 |
| Control           | DDW       | 0                        | 0 | 1 |
|                   | 0.1 mM HU | 2                        | 1 | 1 |
| HA-ORC1 (244-511) | DDW       | 0                        | 0 | 1 |
|                   | 0.1 mM HU | 5                        | 4 | 4 |

FigS2\_Source\_data

| Supplementary Figure S2A |               |          |          |          |          |          |          |          |          |          |
|--------------------------|---------------|----------|----------|----------|----------|----------|----------|----------|----------|----------|
| Telomere                 |               | 1        | 2        | 3        | 4        | 5        | 6        | 7        | 8        | 9        |
| Empty vector             | Parental HeLa | 0.023172 | 0.024908 | 0.022977 | 0.033663 | 0.029927 | 0.028749 | 0.004756 | 0.005121 | 0.004957 |
|                          | TRF2 WT 7-1   | 0.041229 | 0.031583 | 0.033020 | 0.025275 | 0.024721 | 0.024082 | 0.020525 | 0.017232 | 0.017583 |
|                          | TRF2 EE 4-3   | 0.040073 | 0.039101 | 0.041975 | 0.048434 | 0.051786 | 0.042468 | 0.007675 | 0.008522 | 0.009430 |
|                          | TRF2 EE 7-7   | 0.024052 | 0.052235 | 0.050519 | 0.050002 | 0.047797 | 0.049040 | 0.015771 | 0.015629 | 0.014241 |
| ORC1-3xFLAG              | Parental HeLa | 0.101396 | 0.114644 | 0.126977 | 0.123031 | 0.143423 | 0.153145 | 0.016492 | 0.018509 | 0.016546 |
|                          | TRF2 WT 7-1   | 0.199148 | 0.208464 | 0.224745 | 0.289229 | 0.285493 | 0.234704 | 0.085762 | 0.092846 | 0.090091 |
|                          | TRF2 EE 4-3   | 0.063529 | 0.073703 | 0.054370 | 0.116376 | 0.102010 | 0.100045 | 0.008098 | 0.009488 | 0.007438 |
|                          | TRF2 EE 7-7   | 0.067755 | 0.073269 | 0.073237 | 0.086894 | 0.072606 | 0.071894 | 0.018155 | 0.020149 | 0.021038 |
| LMNB2 origin             |               | 1        | 2        | 3        | 4        | 5        | 6        | 7        | 8        | 9        |
| Empty vector             | Parental HeLa | 0.005058 | 0.000179 | 0.000000 | 0.000000 | 0.005693 | 0.003786 | 0.000659 | 0.000482 | 0.001805 |
|                          | TRF2 WT 7-1   | 0.006110 | 0.001156 | 0.003596 | 0.000004 | 0.004148 | 0.000000 | 0.000003 | 0.003802 | 0.004407 |
|                          | TRF2 EE 4-3   | 0.000000 | 0.001527 | 0.003811 | 0.002338 | 0.007457 | 0.004728 | 0.001014 | 0.000477 | 0.002097 |
|                          | TRF2 EE 7-7   | 0.009444 | 0.004088 | 0.009058 | 0.000049 | 0.000000 | 0.000000 | 0.000000 | 0.000627 | 0.000765 |
| ORC1-3xFLAG              | Parental HeLa | 0.011971 | 0.014320 | 0.012660 | 0.013494 | 0.016038 | 0.020894 | 0.007979 | 0.010267 | 0.003528 |
|                          | TRF2 WT 7-1   | 0.039951 | 0.053167 | 0.036111 | 0.073241 | 0.069610 | 0.080086 | 0.031060 | 0.015481 | 0.014359 |
|                          | TRF2 EE 4-3   | 0.013441 | 0.015785 | 0.011785 | 0.055761 | 0.040160 | 0.036503 | 0.008902 | 0.009187 | 0.011322 |
|                          | TRF2 EE 7-7   | 0.022457 | 0.019063 | 0.035143 | 0.035332 | 0.017634 | 0.021896 | 0.015631 | 0.020973 | 0.027755 |

| Supplementary Figure S2B |        |
|--------------------------|--------|
| TRF2 WT 7-1              | 0.1039 |
| TRF2 EE 4-3              | 0.0508 |
| TRF2 EE7-7               | 0.0495 |



FigS3\_Source\_data

| Supplementary Figure S3                       |               |      |      |      |
|-----------------------------------------------|---------------|------|------|------|
| Number of telomere-free micronuclei / nucleus |               | 1    | 2    | 3    |
| DDW                                           | Parental HeLa | 0.02 | 0.04 | 0.06 |
|                                               | TRF2 WT 7-1   | 0.03 | 0.05 | 0.06 |
|                                               | TRF2 EE 4-3   | 0.05 | 0.16 | 0.15 |
|                                               | TRF2 EE 7-7   | 0.12 | 0.02 | 0.06 |
| 0.1 mM HU                                     | Parental HeLa | 0.03 | 0.06 | 0.05 |
|                                               | TRF2 WT 7-1   | 0.07 | 0.14 | 0.07 |
|                                               | TRF2 EE 4-3   | 0.14 | 0.16 | 0.25 |
|                                               | TRF2 EE 7-7   | 0.06 | 0.04 | 0.16 |

FigS4\_Source\_data

| Supplementary Figure S4 |                        | Experiment 1 |                |               | Experiment 2 |                |               |
|-------------------------|------------------------|--------------|----------------|---------------|--------------|----------------|---------------|
|                         |                        | # LacI foci  | # Co-loc. foci | Co-loc. freq. | # LacI foci  | # Co-loc. foci | Co-loc. freq. |
| ORC1-3xFLAG             | HA-LacI                | 125          | 1              | 0.8           | 73           | 3              | 4.1           |
|                         | TRF2 $\Delta$ Myb-LacI | 98           | 54             | 55.1          | 74           | 24             | 32.4          |
| ORC1 (L229A)-3xFLAG     | HA-LacI                | 71           | 5              | 7.0           | 74           | 1              | 1.4           |
|                         | TRF2 $\Delta$ Myb-LacI | 82           | 44             | 43.7          | 72           | 28             | 38.9          |

FigS5\_Source\_data

| Supplementary Figure S5 | Experiment 1 | Experiment 2 |
|-------------------------|--------------|--------------|
| Empty vector            | 1            | 1            |
| FLAG-ORC1 (244-511)     | 0.27         | 0.16         |

FigS7\_Source\_data

| Supplementary Figure S7 | Experiment 1 | Experiment 2 |
|-------------------------|--------------|--------------|
| Control                 | 1.07         | 1.69         |
| Cdt1                    | 2.04         | 3.36         |
| Cdt1 + ORC1 WT          | 5.3          | 9.13         |
| Cdt1 + ORC1 D620A       | 2.51         | 3.85         |

FigS8\_Source\_data

| Supplementary Figure S8B | Days | 1     | 2     |
|--------------------------|------|-------|-------|
| Control                  | 1    | 0.250 | 0.250 |
|                          | 2    | 0.525 | 0.616 |
|                          | 3    | 1.614 | 0.829 |
|                          | 4    | 2.740 | 2.342 |
|                          | 5    | 5.025 | 4.579 |
| HA-ORC1 (244-511)        | 1    | 0.250 | 0.250 |
|                          | 2    | 0.690 | 0.486 |
|                          | 3    | 1.573 | 0.962 |
|                          | 4    | 3.266 | 1.875 |
|                          | 5    | 6.210 | 3.703 |

| Supplementary Figure S8C | 1     |       |      | 2     |       |       |
|--------------------------|-------|-------|------|-------|-------|-------|
|                          | G1    | S     | G2/M | G1    | S     | G2/M  |
| Control                  | 65.35 | 27.3  | 7.36 | 66.07 | 23.79 | 10.14 |
| HA-ORC1 (244-511)        | 67.37 | 23.85 | 8.78 | 69.87 | 20.76 | 9.37  |

FigS9\_Source\_data

| Supplementary Figure S9 |                   |          |          |          |          |          |          |
|-------------------------|-------------------|----------|----------|----------|----------|----------|----------|
| Telomere                |                   | 1        | 2        | 3        | 4        | 5        | 6        |
| Empty vector            | Control           | 0.095468 | 0.085217 | 0.099072 | 0.097818 | 0.121524 | 0.107805 |
|                         | HA-ORC1 (244-511) | 0.159064 | 0.173862 | 0.187148 | 0.053795 | 0.049745 | 0.052083 |
| ORC1-3xFLAG             | Control           | 0.485382 | 0.494429 | 0.332596 | 0.396963 | 0.403065 | 0.367355 |
|                         | HA-ORC1 (244-511) | 0.158685 | 0.184199 | 0.198534 | 0.141315 | 0.154423 | 0.185552 |
| LMNB2 origin            |                   | 1        | 2        | 3        | 4        | 5        | 6        |
| Empty vector            | Control           | 0.020041 | 0.014918 | 0.006336 | 0.018960 | 0.000000 | 0.000100 |
|                         | HA-ORC1 (244-511) | 0.000000 | 0.000000 | 0.034150 | 0.000000 | 0.009791 | 0.000000 |
| ORC1-3xFLAG             | Control           | 0.045274 | 0.045132 | 0.019274 | 0.064199 | 0.051114 | 0.030957 |
|                         | HA-ORC1 (244-511) | 0.071192 | 0.096277 | 0.051757 | 0.040642 | 0.038818 | 0.031088 |
